# Supplementary material for: Influence of acidity on liquid−liquid phase transitions of mixed SOA proxy–inorganic aerosol droplets
Source: Copernicus journal article supplement (doi:10.5194/egusphere-2023-692), 2023-04-21
Supplement: Supplementary file 1 [file egusphere-2023-692-supplement.pdf]

# 1 Influence of pH on Liquid–Liquid Phase Transitions of mixed SOA 2 proxy–inorganic Aerosol Droplets

3 Yueling Chen<sup>1</sup>& Xiangyu Pei<sup>1</sup>, Huichao Liu<sup>1</sup>, Yikan Meng<sup>1</sup>, Zhengning Xu<sup>1</sup>, Fei Zhang<sup>1</sup>, Chun Xiong<sup>1</sup>,  
4 Thomas C. Preston<sup>3</sup>, Zhibin Wang<sup>1,2,4\*</sup>

5 <sup>1</sup>College of Environmental and Resource Sciences, Zhejiang Provincial Key Laboratory of Organic Pollution Process and  
6 Control, Zhejiang University, Hangzhou 310058, China

7 <sup>2</sup>ZJU-Hangzhou Global Scientific and Technological Innovation Center, Zhejiang University, Hangzhou 311215, China

8 <sup>3</sup>Department of Atmospheric and Oceanic Sciences and Department of Chemistry, McGill University, 805 Sherbrooke Street  
9 West, Montreal, Quebec H3A 0B9, Canada

10 <sup>4</sup>Key Laboratory of Environment Remediation and Ecological Health, Ministry of Education, Zhejiang University, Hangzhou  
11 310058, China

12 Correspondence to: Zhibin Wang ([wangzhibin@zju.edu.cn](mailto:wangzhibin@zju.edu.cn))

13 Yueling Chen and Xiangyu Pei contribute equally to this work.

14

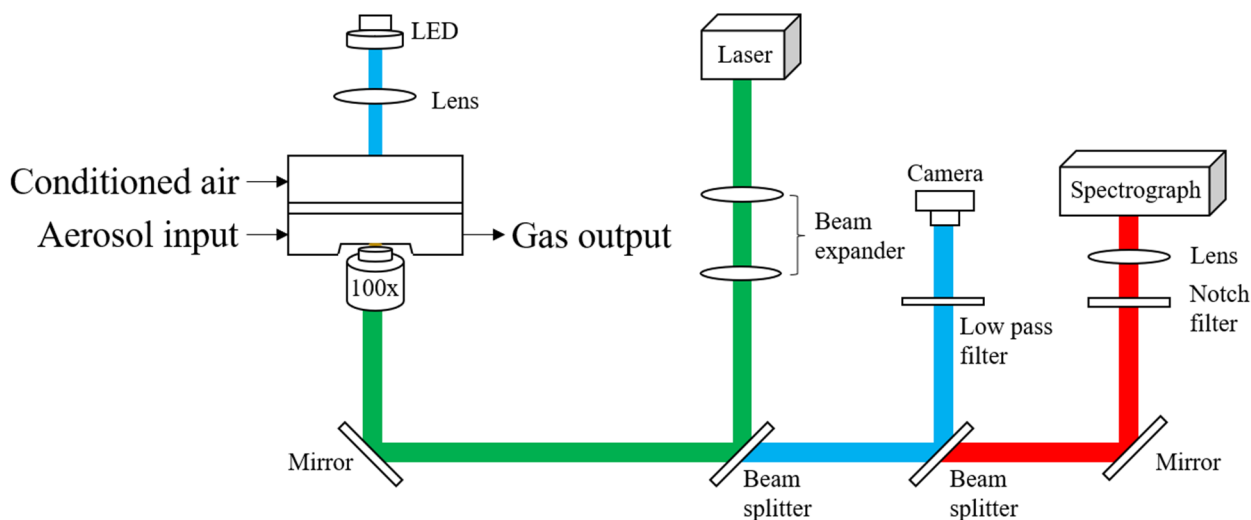

15

16 Figure S1. Schematic of aerosol optical tweezer setup used in this study. Medical nebulizer nebulized dissolved solution to  
17 generate aerosol droplets. Conditioned airflow is mixed by a dry airflow and a humid airflow that humidified by a water  
18 bubbler. A temperature and humidity sensor measured the temperature and RH of the conditioned airflow after it enters the  
19 chamber.

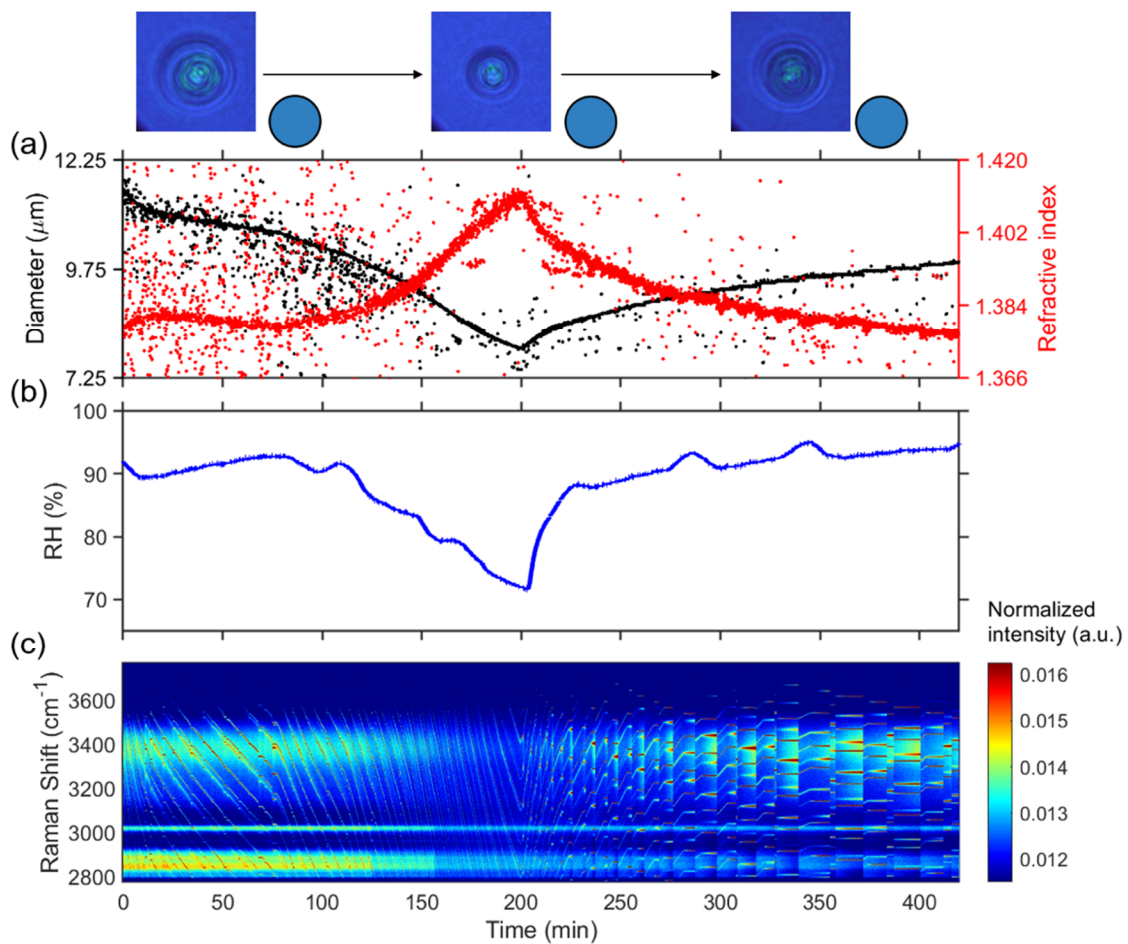

20

21 Figure S2. Result of GL/AS system. (a) Timescale of changes in droplet size and refractive index, determined from fitting the  
 22 Raman shift positions of the WGMs. (b) RH variation after the trapping chamber during the humidity changing process with  
 23 time. (c) Time-resolved Raman spectra.

24

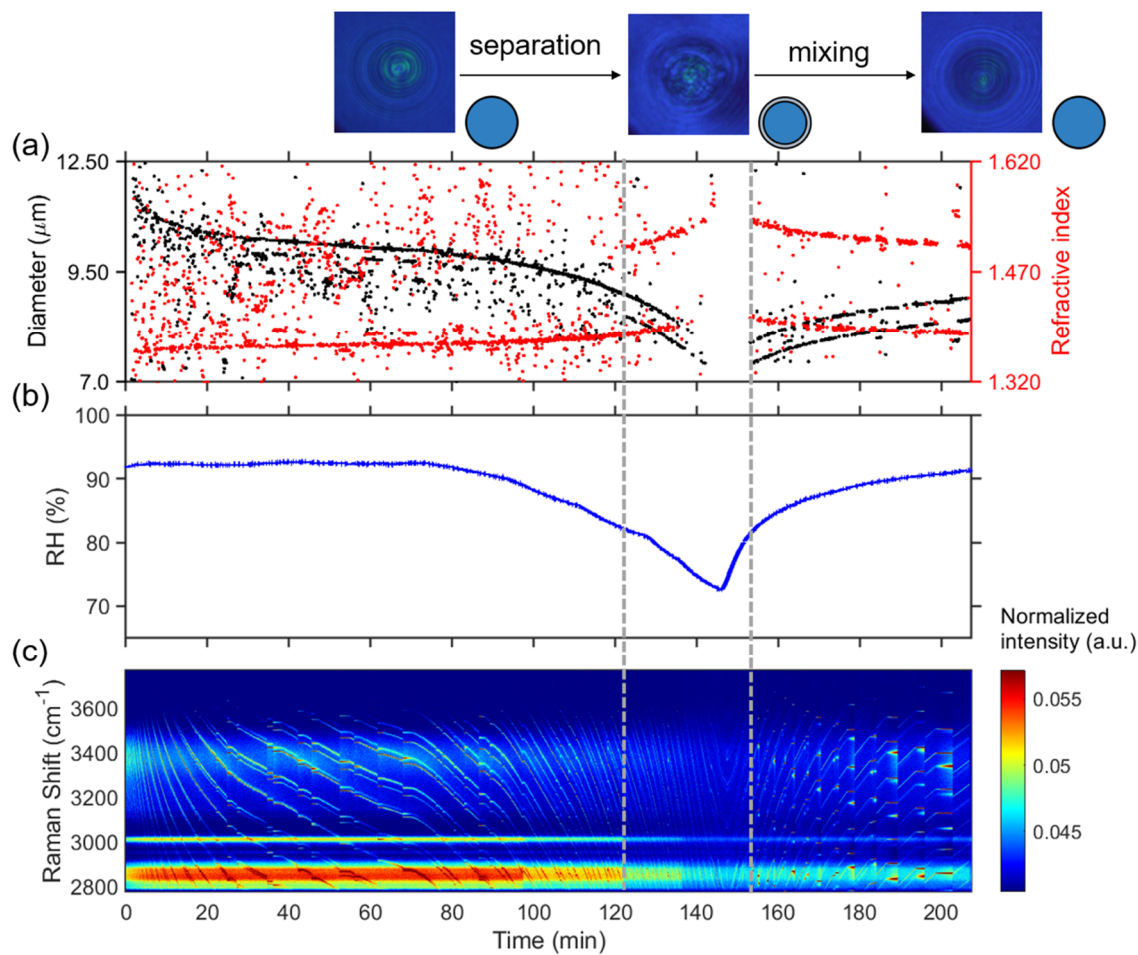

25

26 Figure S3. Liquid-liquid phase separation of aqueous of HEXT-IV. (a) Timescale of changes in droplet size and refractive  
 27 index, determined from fitting the Raman shift positions of the WGMs. (b) RH variation after the trapping chamber during the  
 28 humidity changing process with time. (c) Time-resolved Raman spectra. The cessation of the random motion of inclusions  
 29 within the droplet and the resultant formation of a core-shell structure are indicated by the grey dashed line on the left. The  
 30 grey dashed line on the right serves as an indication of the point at which the droplet morphology transitions from a state of  
 31 phase separation to a homogeneous phase morphology. This transformation is characterized by the occurrence of phase mixing.

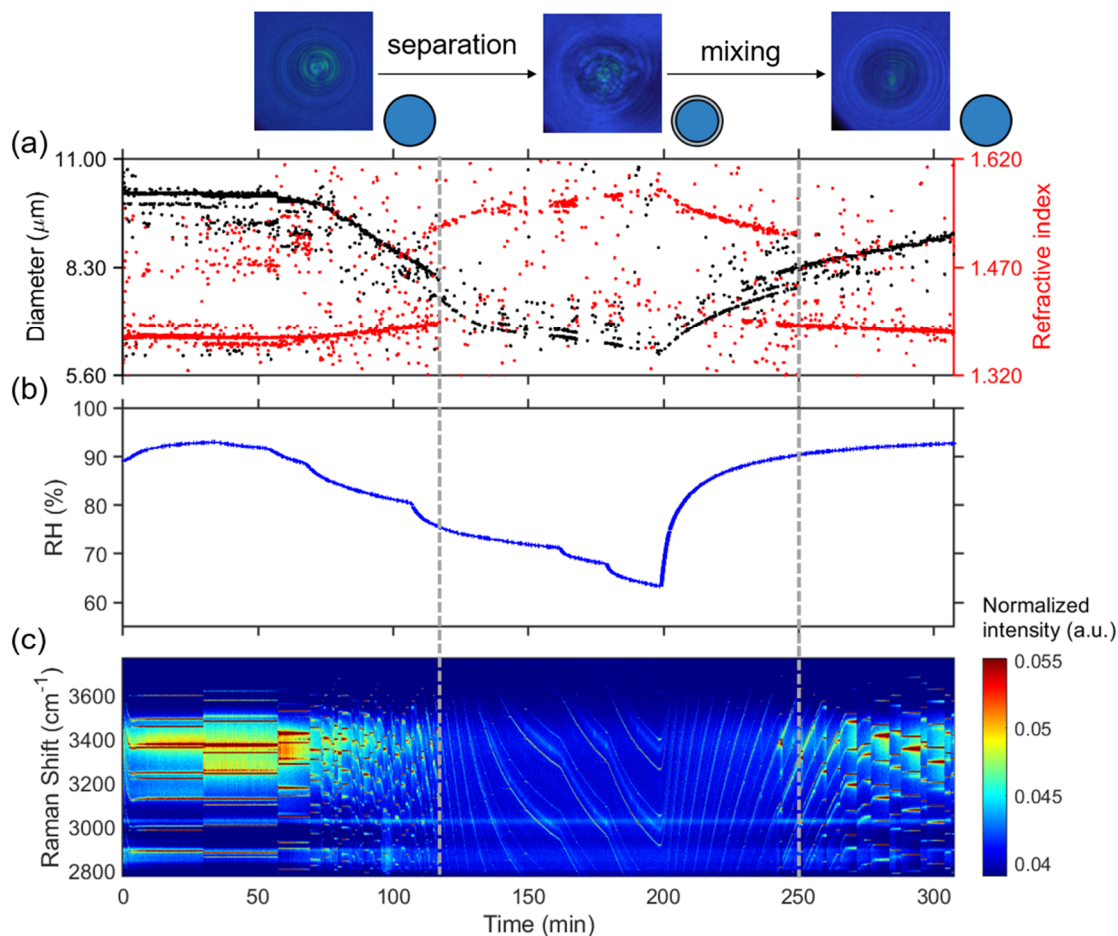

32

33 Figure S4. Liquid-liquid phase separation of aqueous of HEXD-V. (a) Timescale of changes in droplet size and refractive  
 34 index, determined from fitting the Raman shift positions of the WGMs. (b) RH variation after the trapping chamber during the  
 35 humidity changing process. (c) Time-resolved Raman spectra. The cessation of the random motion of inclusions within the  
 36 droplet and the resultant formation of a core-shell structure are indicated by the grey dashed line on the left. The grey dashed  
 37 line on the right serves as an indication of the point at which the droplet morphology transitions from a state of phase separation  
 38 to a homogeneous phase morphology. This transformation is characterized by the occurrence of phase mixing.

39

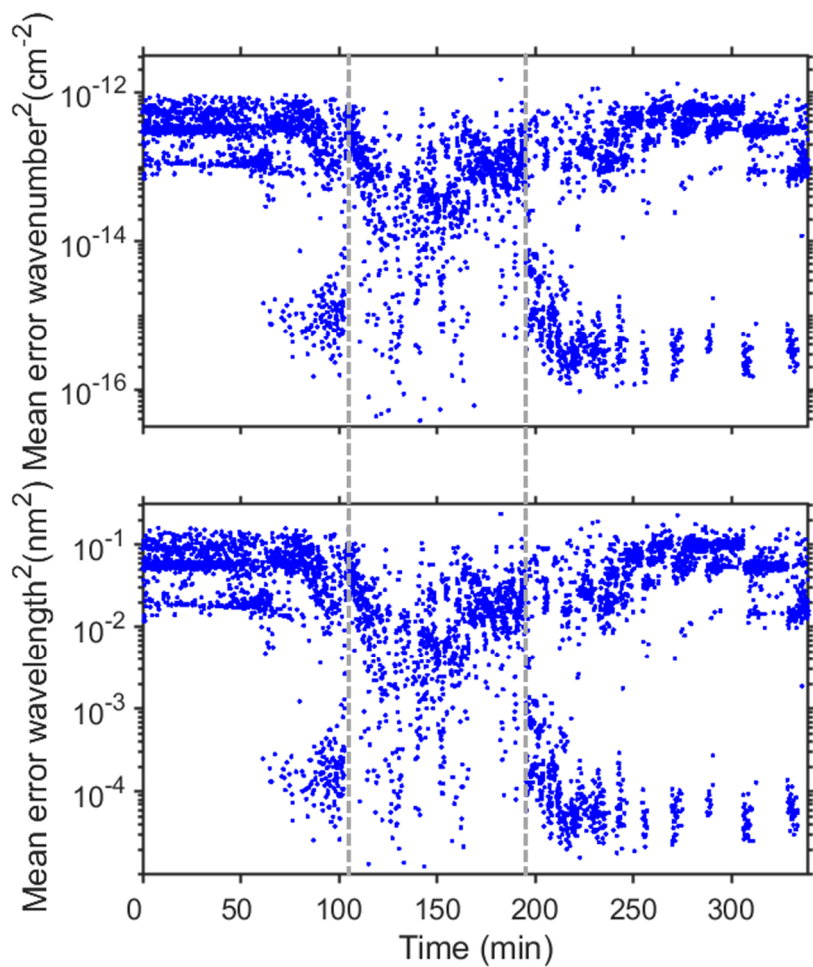

40

41 Figure S5. Fitting errors of the WGMs based on the homogenous Mie scattering model, corresponding to Figure 2 in the main  
42 text. The grey dashed lines indicated the moments of LLPS and phase mixing, respectively. The messy points in the figure  
43 primarily resulted from the errors generated during the batch peak finding process using the ipeak algorithm.

44

45

46

Table S1. Purity and suppliers of the compounds used in this study.

| Compounds | Purity                    | Supplier                   |
|-----------|---------------------------|----------------------------|
| GL        | 99.5%                     | Meryer                     |
| 3-MGA     | 99.0%                     | Macklin                    |
| HEXT      | 99.0%                     | TCI                        |
| HEXD      | 99.0%                     | Heowns Biochem LLC         |
| AS        | analytical reagent, >99%  | Sinopharm chemical reagent |
| SA        | analytical reagent, >99%  | Sinopharm chemical reagent |
| NaOH      | analytical reagent, 98.0% | Sinopharm chemical reagent |

47

48 Table S2. Detailed SRH information of 3-MGA/AS system studied, as well as initial diameter, separation diameter (SD),  
 49 separation relative index (SRI), MRH, mixing diameter (MD), and mixing relative index (MRI) data. Meanwhile, the last  
 50 column presents the morphology of droplets when the llops occurred, core shell structure (CS) or partially-engulfed struture  
 51 (PE).

| Initial pH | Initial Dp (nm) | SRH (%) | SD (nm) | SRI ( $\lambda=650\text{nm}$ ) | MRH (%) | MD (nm) | MRI ( $\lambda=650\text{nm}$ ) | Morphology |
|------------|-----------------|---------|---------|--------------------------------|---------|---------|--------------------------------|------------|
| 0.48       | 9.86            | 69.5    | 6.02    | 1.576                          | 83.5    | 6.82    | 1.540                          | CS         |
|            | 12.08           | 69.8    | 8.45    | 1.454                          |         |         |                                | PE         |
| 1.19       | 9.85            | 75.9    | 6.05    | 1.570                          | 76.3    | 6.04    | 1.571                          | CS         |
|            | 11.85           | 80.7    | 10.66   | 1.398                          | 90.5    | 10.61   | 1.399                          | CS         |
|            | 11.99           | 76.4    | 9.32    | 1.394                          | 91.4    | 9.30    | 1.399                          | CS         |
| 2.7        | 8.99            | 75.6    | 6.62    | 1.559                          | 84.5    | 6.71    | 1.566                          | CS         |
|            | 12.21           | 82.6    | 9.03    | 1.401                          | 90      | 9.01    | 1.400                          | CS         |
| 3.7        | 10.28           | 84.7    | 7.04    | 1.518                          |         |         |                                | CS         |
|            | 9.37            | 76.3    | 6.34    | 1.563                          |         |         |                                | CS         |
|            | 12.97           | 84.6    | 8.32    | 1.394                          |         |         |                                | PE         |
| 5.21       | 12.92           | 89.2    | 9.02    | 1.364                          | 89.5    | 7.89    | 1.381                          | CS         |
|            | 10.37           | 89.8    | 8.74    | 1.374                          |         |         |                                | CS         |
| 6.53       | 13.79           | 92.7    | 10.10   | 1.262                          | 87.6    | 7.85    | 1.387                          | CS         |

52

53

54 Table S3. Detailed SRH information of HEXT/AS system studied, as well as initial diameter, separation diameter (SD),  
 55 separation relative index (SRI), MRH, mixing diameter (MD), and mixing relative index (MRI) data. Meanwhile, the last  
 56 column presents the morphology of droplets when the lps occurred.

| Initial pH | Initial Dp (nm) | SRH (%) | SD (nm) | SRI ( $\lambda=650\text{nm}$ ) | MRH (%) | MD (nm) | MRI ( $\lambda=650\text{nm}$ ) | Morphology |
|------------|-----------------|---------|---------|--------------------------------|---------|---------|--------------------------------|------------|
| 0.92       | 14.04           | 75.7    | 10.58   | 1.438                          | 85.7    | 10.83   | 1.420                          | CS         |
| 2.02       | 11.77           | 76.9    | 9.04    | 1.412                          |         |         |                                | CS         |
|            | 13.70           | 75.7    | 8.46    | 1.398                          |         |         |                                | CS         |
|            | 13.78           | 73.8    | 9.45    | 1.413                          |         |         |                                | CS         |
|            | 12.27           | 79.2    | 9.41    | 1.412                          | 81.8    | 9.34    | 1.410                          | CS         |
| 3.14       | 11.14           | 77.3    | 8.44    | 1.407                          |         |         |                                | CS         |
|            | 13.10           | 78.1    | 9.38    | 1.410                          |         |         |                                | CS         |
|            | 12.39           | 74.7    | 9.05    | 1.408                          | 81.3    | 9.04    | 1.409                          | CS         |
|            | 12.60           | 76.2    | 9.18    | 1.408                          |         |         |                                | CS         |
| 5.11       | 13.96           | 76.8    | 8.90    | 1.394                          | 81.9    | 8.52    | 1.412                          | CS         |
|            | 13.48           | 82.2    | 9.00    | 1.383                          |         |         |                                | CS         |
|            | 13.14           | 75.9    | 9.55    | 1.411                          | 85.9    | 9.56    | 1.412                          | CS         |

57  
 58 Table S4. Detailed SRH information of HEXD/AS system studied, as well as initial diameter, separation diameter (SD),  
 59 separation relative index (SRI), MRH, mixing diameter (MD), and mixing relative index (MRI) data. Meanwhile, the last  
 60 column presents the morphology of droplets when the lps occurred.

| Initial pH | Initial Dp (nm) | SRH (%) | SD (nm) | SRI ( $\lambda=650\text{nm}$ ) | MRH (%) | MD (nm) | MRI ( $\lambda=650\text{nm}$ ) | Morphology |
|------------|-----------------|---------|---------|--------------------------------|---------|---------|--------------------------------|------------|
| 1.39       | 11.28           | 82.4    | 8.64    | 1.375                          |         |         |                                | CS         |
|            | 12.35           | 68.0    | 7.96    | 1.414                          |         |         |                                | CS         |
|            | 10.82           | 69.9    | 7.83    | 1.408                          | 81.2    | 7.93    | 1.406                          | CS         |
| 2.03       | 10.18           | 80.1    | 8.05    | 1.390                          |         |         |                                | CS         |
|            | 10.24           | 84.0    | 8.81    | 1.376                          |         |         |                                | CS         |
|            | 11.19           | 84.2    | 6.85    | 1.380                          | 87.3    | 8.83    | 1.392                          | CS         |
| 2.71       | 13.20           | 78.8    | 8.24    | 1.391                          | 89.1    | 8.44    | 1.389                          | CS         |
|            | 14.54           | 78.9    | 8.61    | 1.382                          | 91.8    | 8.89    | 1.377                          | CS         |
|            | 15.91           | 75.3    | 8.06    | 1.400                          | 88.0    | 8.27    | 1.397                          | CS         |
| 3.13       | 10.79           | 81.5    | 8.77    | 1.376                          |         |         |                                | CS         |
|            | 11.72           | 80.2    | 9.21    | 1.403                          | 89.3    | 9.14    | 1.384                          | CS         |
|            | 10.54           | 81.4    | 8.92    | 1.373                          |         |         |                                | CS         |
| 5.01       | 10.20           | 81.4    | 8.77    | 1.362                          |         |         |                                | CS         |
|            | 10.55           | 75.5    | 8.01    | 1.393                          | 89.7    | 8.00    | 1.393                          | CS         |
|            | 15.09           | 81.2    | 8.20    | 1.397                          | 89.5    | 8.76    | 1.387                          | CS         |

61
