# Supplementary material for: Influence of acidity on liquid−liquid phase transitions of mixed SOA proxy–inorganic aerosol droplets
Source: Copernicus journal article supplement (doi:10.5194/egusphere-2023-692), 2023-04-21
Supplement: Supplementary file [file egusphere-2023-692-AC1-supplement.pdf]

## **Reply to comments on “Influence of acidity on liquid-liquid phase transitions of mixed SOA proxy-inorganic aerosol droplets” by Yueling Chen et al.**

### **Reply to Anonymous Referee #1**

1) Chen et al. “Influence of acidity on liquid-liquid phase transitions of mixed SOA proxy-inorganic aerosol droplets” details the measurement of particle morphology and the separation relative humidity of 3 organic compounds with ammonium sulfate as a function of bulk pH. The results differ significantly from Losey et al. 2016 and 2018 for the two overlapping systems and Tong et al. 2022 for the one overlapping system. The explanation of the differences from previous literature is not sufficient as currently presented in the manuscript, and the work significantly overlaps with previous literature. Specific comments are given below. The language of the manuscript is generally clear, but should be read through with specific attention to grammar again. This work requires substantial revision prior to possible publication.

**Response: We truly appreciate the constructive comments and suggestions raised by the referee. Those comments are valuable and very helpful for improving our paper, with important guiding significance to our studies. Below we provide a point-by-point response to individual comment. The responses are shown in brown and bold fonts, and the added/rewritten parts are presented in blue and bold fonts. Also, we have read through with specific attention to grammar again and the revised manuscript has been improved.**

## **Specific Comments:**

1) **Line 33:** “Morphology can be broadly categorized into single-phase homogeneous morphology and phase separation morphology (Gorkowski et al., 2020), based on the phase state of the particle.” Bertram et al. 2011 or earlier work (e.g. Ciobanu et al. 2009) may be more appropriate references for this statement.

**Response: Thanks for the advice, we have revised the cited reference:**

**“Morphology can be broadly categorized into single-phase homogeneous morphology and phase separation morphology (Bertram et al. 2011; Ciobanu et al. 2009), based on the phase state of the particle.”**

2) **Line 35:** “For droplets with a phase separation morphology, the two main equilibrium morphologies are a fully engulfed (core-shell) structure and a partially engulfed structure (Freedman, 2020).” Reid et al. 2011 is a better reference for this statement.

**Response: Thanks for the advice, we have revised the cited reference.**

**“For droplets with a phase separation morphology, the two main equilibrium morphologies are a fully engulfed (core-shell) structure and a partially engulfed structure (Reid et al. 2011).”**

3) **Line 41:** “The reverse process, in which two liquid phases mix into a single homogenous liquid phase, is referred to as liquid-liquid phase mixing and the corresponding RH is the mixing RH (MRH; Gorkowski et al., 2017).” You et al. 2014 may be a better reference for this statement.

**Response: Thanks for the advice, we have added the earlier reference.**

**“The reverse process, in which two liquid phases mix into a single homogenous liquid phase, is referred to as liquid-liquid phase mixing and the corresponding RH is the mixing RH (MRH; You et al. 2014; Gorkowski et al., 2017).”**

4) **Line 48:** “More recently, Kucinski et al. (2021) found that submicrometer-sized aerosol particles had a lower SRH compared to micrometer-sized droplets.” Both this reference and the more recent Ohno et al. should be cited (see references below).

**Response: Thanks for the advice, we have added the cited references.**

**“More recently, it is found that submicrometer-sized aerosol particles had a lower SRH compared to micrometer-sized droplets (Kucinski et al., 2021; Ohno et al., 2021).”**

5) **Line 57:** “Losey et al. (2018) measured the RH of phase transitions using optical microscopy and discovered that for low-pH aerosol particles ( $\leq 0.35$ ), phase separation may be hindered by the addition of sulfuric acid.” Relevant for this paper is the fact that SRH was also found to decrease as acidity increased, and a greater change was observed for systems with lower initial SRH values. Also, both 3-methylglutaric acid and 1,2,6-hexanetriol were also studied in the cited paper. Considering you are using both sulfuric acid and sodium hydroxide to adjust the pH of your solutions, the results of Losey et al. 2016 should also be discussed and cited.

**Response: Thanks for the suggestion, we have revised the manuscript.**

**“Losey et al. (2018) studied six organic components and discovered that phase separation may be hindered by the addition of sulfuric acid, while the SRH of 3-methylglutaric acid/ammonium sulfate system was found to decrease with the**

**addition of sodium hydroxide (Losey et al. 2016), as the deprotonation of organic component or difference in salting out ability of inorganic may change the SRH.”**

6) **Line 62:** “Nevertheless, parallel experiments in this study were not conducted to accurately determine the uncertainty of the measurements.” The uncertainty of measurements of the study presented in this manuscript or in the cited manuscript?

**Response: Sorry for the confusion. In Tong’s manuscript, only a single set of data was presented for each pH value. What we want to express is that parallel experiments were not conducted or clearly demonstrated to accurately determine the uncertainty of the measurements in the cited manuscript.**

7) **Line 83:** The addition of sodium hydroxide changes the composition of the inorganic part of the solution, and will affect the SRH values measured.

**Response: This is a very good suggestion. We used sodium hydroxide as it is a strong base, which is conducive to change the pH of the bulk solution with a minimum amount. However, it should be noted that the addition of sodium hydroxide changes the composition of the inorganic part of the solution, and may affect the SRH values measured. We have clarified in the manuscript:**

**“Sodium hydroxide, a strong base, allowed for pH adjustment with minimal usage (Losey et al., 2016). However, it is necessary to acknowledge that the addition of NaOH changes the composition of the inorganic part of the solution, potentially affecting the SRH values measured.”**

8) **Line 152:** Insert “either” to make the sentence “When LLPS occurred, the droplets changed from a symmetrical homogeneous phase to either an asymmetrical...”

**Response: Corrected.**

9) **Fig. S3** is marked as GL/AS, which is not the system referred to on line 166. Then on line 177, the GL/AS system is referred to.

**Response: We have revised the manuscript. Fig. S2 represents GL/AS system. Fig. S3 and Fig. S4 represent HEXT-IV and HEXD-V, respectively.**

10) **Fig. 2:** Why is it clear from the WGMs that the system is phase separating into a core-shell structure rather than a partially engulfed structure? The WGMs in the phase separated region are very messy.

**Response: Thanks for your comment. In the phase separation region depicted in Fig. 2c, the WGMs persist. Based on this observation, we conclude that the phase-separated system exhibits a core-shell structure rather than a partially engulfed structure. In addition, as the droplets undergo phase separation, the WGMs signal is significantly weakened, resulting in increased errors when identifying the peak positions of WGMs. As a result, the WGMs in the phase separated region are messy.**

11) **Methods section:** Please clarify which systems have added H<sub>2</sub>SO<sub>4</sub> and which systems have added NaOH. This is important for comparison to Losey et al. 2016 and 2018.

**Response: We have clarified in the manuscript:**

**“For the 3-MGA/AS system, either SA or NaOH was utilized, while for the HEXT/AS and HEXD/AS systems, only SA was used.”**

**Paragraph beginning at line 186:**

12) **Comment 1:** As the pH is dropped, the pH values differ up to ~30% from Losey et al. 2016 and ~6-7% from Losey et al. 2018. The trend also differs from these two papers, with a constant decrease of SRH with decreasing pH instead of a maximum at a pH of ~pH=3.7. Certainly this can not only be due to the difference in techniques. Optical microscopy on hydrophobic substrates has been used to measure SRH in numerous papers; optical trapping has been used more rarely. The point of using a hydrophobic substrate is to minimize interactions between the particle and the substrate. SRH is generally thought to be accurate with optical microscopy, though morphology information is much less reliable. Is there a known difference in the SRH measured between these two techniques? If so, references should be provided. Also, what system was used to calibrate the SRH of the technique used in this paper? Data on calibration should be provided in the SI.

**Response: Thanks for your suggestion. We admit that optical microscopy has been widely used to measure SRH in numerous papers (Ott et al., 2020; Song et al., 2012), and the results are promising when retrieving SRH. Instead, AOT is a relatively new technique for measuring the physicochemical properties of aerosol droplets, and its application in SRH measurement is limited. To our knowledge, there is only one study (Tong et al., 2022) comparing the SRH measured by these two techniques. The results showed identified discrepancies, particularly at pH values below 3. For example, at pH 4.8, the SRH values differ up to ~8%. At pH 2.8,**

the discrepancy of SRH values is close. At pH 1.1, the SRH values differ up to ~40%. The authors attributed the discrepancies to the ambient conditions (e.g., levitated or deposited; spherical or spherical crown) and the Kelvin effect. Therefore, it is hard to systematically compare the measurement discrepancy.

Also, we agree that the hydrophobic substrate is able to minimize interactions between the particle and the substrate, while the morphology of the droplets may still be influenced by the contact coverslip (Zhou et al., 2014; Tong et al., 2022). Zhou et al. (2014) discussed the confocal Raman spectra analysis of mixed phthalic acid/ammonium sulfate droplets on PTFE and glass substrates, revealing the influence of salting-out effect and substrate properties on the morphology of mixed aerosols. Therefore, we speculate the different ambient conditions of the droplets may contribute to the observed discrepancy. The laser levitation, resulting in a spherical morphology, while the optical microscopy involves substrate deposition, leading to a morphology resembling a spherical crown. The underlying reasons for these differences are currently unclear, and further investigations are needed.

The application of AOT in measuring SRH of aerosol droplet is limited, and there is currently no universally accepted standard substance with a recognized SRH value. Therefore, it is hard to calibrate the SRH of the AOT. We have revised the manuscript:

**“The observed discrepancy may be attributed to the distinct ambient conditions of the droplets. The laser levitation, resulting in a spherical morphology, while the optical microscopy involves substrate deposition, leading to a morphology resembling a spherical crown (Tong et al., 2022; Zhou et al., 2014). The underlying**

reasons for these differences are currently unclear, and further investigations are needed.”

13) **Comment 2:** As the pH decreases, ammonium sulfate becomes ammonium bisulfate. The salting out ability of sulfate vs. bisulfate should be different. This is the argument made in Losey et al. 2018.

**Response: Thanks for your crucial suggestions. We have revised the manuscript:**

**“With a decrease in pH, ammonium sulfate transforms into ammonium bisulfate. Predicted by the Hofmeister series, ammonium bisulfate exhibits a weaker salting out effect compared to ammonium sulfate and thus hinders the ability of organic matter to precipitate out of the solution (Losey et al., 2018).”**

14) **Comment 3:** This manuscript reports that MRH differs from SRH for all pH values except 5.21. Losey et al. 2016 finds that MRH differs from SRH only at pH 5.17 and 6.45. MRH is the same as SRH at all other values of pH used in Losey et al. 2016 and 2018. Why is a difference observed between these two papers? Also, if MRH differs from SRH, one would expect a higher value (just as DRH>ERH because of the activation barrier required for ERH), but this is not the case for pH 6.53. What is the author’s explanation of this result?

**Response: Thank you for pointing this out. In principle, The MRH is higher than SRH, because the SRH process has an activation barrier while the MRH process does not, and lower RH is needed for the aerosol droplet to overcome the activation barrier to form two phases. The MRH is high in both articles across all**



pH values. Therefore, we hypothesize that the difference in MRH is associated with the discrepancy in SRH, which could be attributed to the distinct ambient conditions experienced by the droplets. The laser levitation, resulting in a spherical morphology, while the optical microscopy involves substrate deposition, leading to a morphology resembling a spherical crown (Tong et al., 2022), as we discussed previously.

For pH 6.53, we have conducted the parallel experiment. The SRH at this pH is higher than the MRH, and the values are relatively close to each other. We do not have a specific explanation for this phenomenon, but we suspect that it might potentially be attributed to experimental error.

15) **Comment 4:** Kucinski et al. 2019 is a study of particles  $< 3$  microns in diameter. It is unclear based on the literature that size effects are likely for 100 micron vs. 10 micron diameter particles, as the literature (e.g. Laskina et al. 2015) compare micron to nm diameter particles. The Kelvin effect is not an adequate explanation as it tends to affect the properties of aerosol particles starting at a size of  $\sim 100$  nm and below.

**Response:** Many thanks for your comment. As Tong et al. (2022) explained, Kelvin effect may contributed to the discrepancy of SRH measurement. However, we agree with the reviewer, the Kelvin effect is not suitable for this case and we have consequently excluded this explanation from our discussion.

16) **Comment 5:** Both 10 micron diameter droplets and 100 micron droplets are not representative of organic aerosol found in the atmosphere, which is generally  $< 500$  nm.

These larger droplet sizes are orders of magnitude different than the real system they are trying to simulate. The last sentence of this paragraph should be deleted.

**Response: Deleted.**

**Paragraph beginning at line 209:**

17) **Comment 1:** The results for hexanetriol/ammonium sulfate differ from those of Losey et al. 2018, where a dramatic decrease in SRH with decreasing pH is observed. The trend is not similar. The data also differ significantly from Tong et al. 2022. At the lowest pH values, SRH was not observed in Losey et al. 2018. What is the author's explanation of this difference between this manuscript, Losey et al. 2018, and Tong et al. 2022? Why is only some of the data from Losey et al. 2018 plotted in Fig. 3b?

**Response: Thanks for your comment. Experimental system in this work does not encompass pH values below 0.9, therefore we have only included a subset of the data from Losey et al. 2018 in previous version. We have plotted the complete result from Losey et al. 2018 in the revised Fig. 3b. In general, for HEXT/AS system, the trend between this manuscript, Losey et al. 2018, and Tong et al. 2022 is similar, which is that SRH decreases with decreasing pH. We did not find a very scientific reason to explain this difference. But we speculate that it may be due to the difference in experimental conditions. The concentration of HEXT in this work (50 g/L) is higher than concentration (2.5 wt%, about 26 g/L) of Losey et al. (2018). This difference may facilitate the precipitation of organic matter from the inorganic salts in our work. The OIR in this work is 1:1 and Tong et al. (2022) is 2:1. Previous studies (Ma et al., 2021; Stewart et al., 2015; Song et al., 2012) indicated that OIR differences could affect SRH, but SRH was not significantly dependent on OIR. The**

discrepancy may also be due to the variations in experimental conditions, such as laser power, experimental duration, etc.

We have revised Fig. 3b and explanation in manuscript:

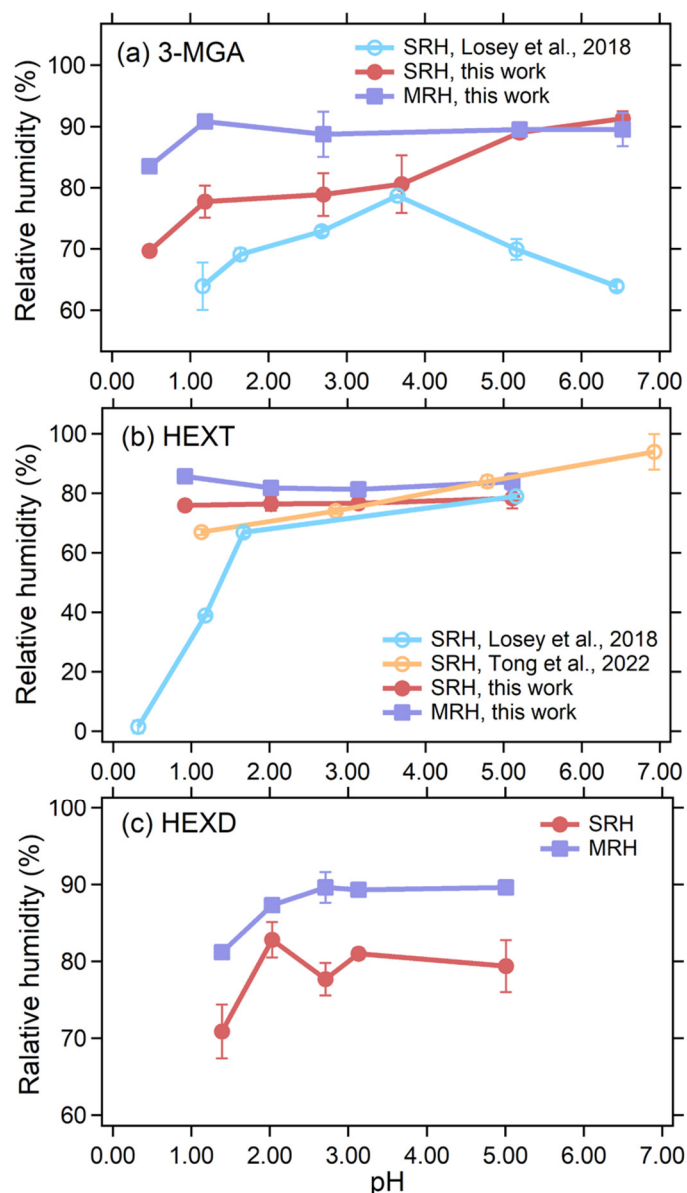

**Figure 5.** SRHs and MRHs as a function of pH for (a) 3-MGA/AS system, (b) HEXT/AS system, (c) HEXD/AS system. Hollow circles represent data from Losey et al. (2018) and Tong et al. (2022). The error bars of SRHs and MRHs are derived from multiple measurements.

The results of Losey et al. (2018) and Tong et al. (2022) were also depicted in Fig. 5b. “Our results differ from those of Losey et al. (2018), who observed a significant decline in SRH as the pH decreased. The specific reason for the discrepancy remains unclear, but we speculate it may be due to different conditions of droplet. Moreover, the concentration of HEXT in this work (50g/L) is higher than concentration (2.5 wt%, about 26 g/L) of Losey et al. (2018). The higher concentration may enhance the precipitation of organic matter from the inorganic salts in our work.” In contrast to the findings of Tong et al. (2022), our study observed a less pronounced trend in the values of SRH, and a narrower range in the distribution of SRH compared to literature values. The difference in OIR between this study (1:1) and Tong et al. (2022) (2:1) may account for the discrepancy in SRH. Previous studies (Ma et al., 2021; Stewart et al., 2015; Song et al., 2012) indicated that OIR differences could affect SRH, but SRH was not significantly dependent on OIR. “The discrepancy in SRH may also be due to the variations in experimental conditions, such as laser power, experimental duration, etc.”

18) **Line 232:** It is unclear how you have reached this conclusion when all of the systems in this manuscript exhibit high SRH values ( $> \sim 70\%$  RH) at the lowest pH values studied.

**Response:** Based on our experimental results, we observed that high acidity hinders the phase separation of droplets. However, it is essential to acknowledge that due to the limitations of our experimental techniques, we were only able to

investigate phase separation at relative humidities above 70%. As a result, we cautiously concluded that droplets with high acidity might remain in a homogeneous phase in the real atmosphere. We admit that this statement lacks complete rigor, and we have revised the manuscript:

“The pH values of misty cloud and fog droplets typically fall within the range of 2 to 7, whereas continental and marine aerosol particles display a broader spectrum of pH values (Pye et al., 2020; Tilgner et al., 2021). Our research suggests that in real atmospheric conditions, phase separation behavior of droplets may be influenced significantly by their acidity.”

19) **Line 237:** What is the volatility of each of the organic compounds used?

**Response:** Thanks for your comment. We have discussed the volatility of each of the organic compounds used in the manuscript:

“Nevertheless, the organic compounds used in this study have low volatility. For instance, the vapor pressure of 3-MGA is  $7.41 \times 10^{-7}$  to  $2.92 \times 10^{-4}$  mmHg (DTXSID50871000, United States Environmental Protection Agency), compare to normal volatile organic components of atmospheric aerosol, such as 2-Methyl-1-propanol with vapor pressure of 10.5 to 16.4 mmHg (DTXSID0021759, United States Environmental Protection Agency). Volatility information of other organics are provided in the Table S5. Also, droplet size change profile can confirm the influence of volatility of organic compounds in our system can be neglected. For example, as shown in Fig. 2, the droplet size is basically same at the beginning and the end of the experiment at the same RH 93.0% (11.85  $\mu\text{m}$  at the beginning and 11.79  $\mu\text{m}$  at the end).”

SI:

Table S5. Vapor pressure of organic compounds used in this study

| Compounds | Vapor pressure (mmHg)                          | Reference               |
|-----------|------------------------------------------------|-------------------------|
| GL        | $1.66 \times 10^{-4}$ to $6.68 \times 10^{-3}$ | DTXSID9020663, EPA      |
|           | $7.41 \times 10^{-7}$ to $2.92 \times 10^{-4}$ | DTXSID50211649, EPA     |
| 3-MGA     | $(6.9 \pm 5.2) \times 10^{-6}$                 | Booth et al. (2010)     |
|           | $(5.5 \pm 2.0) \times 10^{-6}$                 | Mønster et al. (2004)   |
| HEXT      | $2.12 \times 10^{-4}$ to $1.82 \times 10^{-4}$ | DTXSID0041224, EPA      |
|           | $(1.5 \pm 0.15) \times 10^{-6}$                | Cotterell et al. (2010) |
|           | $(8.7 \pm 0.19) \times 10^{-7}$                | Cai et al. (2015)       |
| HEXD      | $1.51 \times 10^{-2}$ to $5.27 \times 10^{-2}$ | DTXSID50871000, EPA     |

EPA means United States Environmental Protection, <https://comptox.epa.gov/> (last access: 20 April 2023).

20) **Table 2:** Should the title be “separation refractive index” and “mixing refractive index” rather than “relative index”? These results are not discussed in the manuscript. What is the number of repeated experiments at each phase transition at each pH? For some systems, it appears that there are only 1 or 2 repeats according to the SI. Three or more trials should be performed. Also, the significant figures retained are often too many considering the magnitude of the error.

**Response: Thanks for your comment. Yes, the title should be “separation refractive index” and “mixing refractive index” rather than “relative index”. We have revised this information and added the discussion in the manuscript:**

**“The separation diameter (SD) of 3-MGA/AS ranges from 7.23  $\mu\text{m}$  to 9.74  $\mu\text{m}$ , with a corresponding separation refractive index (SRI) ranging from 1.362 to 1.515. For HEXT/AS, the SD ranges from 9.01  $\mu\text{m}$  to 9.90  $\mu\text{m}$ , while the SRI ranges from**

1.396 to 1.421. Lastly, the SD of HEXD/AS ranges from 7.45  $\mu\text{m}$  to 8.97  $\mu\text{m}$ , with the SRI ranging from 1.382 to 1.406.”

We have repeated more experiments for some systems, and have revised Fig. 3. and Table 2. For 3-MGA-I, we explain in the manuscript the reason why there are only two trials. Because in other parallel experiments, the SRH of the droplet is lower than the capture range of AOT, the AOT would not be able to continue the capture when the particle size decreases to  $\sim 6 \mu\text{m}$ . Hence, it is possible that the actual SRH at this pH is slightly lower, but this discrepancy does not impact the subsequent results we discuss. The significant figures of diameter and refractive index are determined by WGMs algorithm (Preston and Reid, 2015; Stewart et al., 2015), and the digits of precision are 3 and 4, respectively. Considering the magnitude of the error in our experiments, we have reduced the number of significant digits by one.

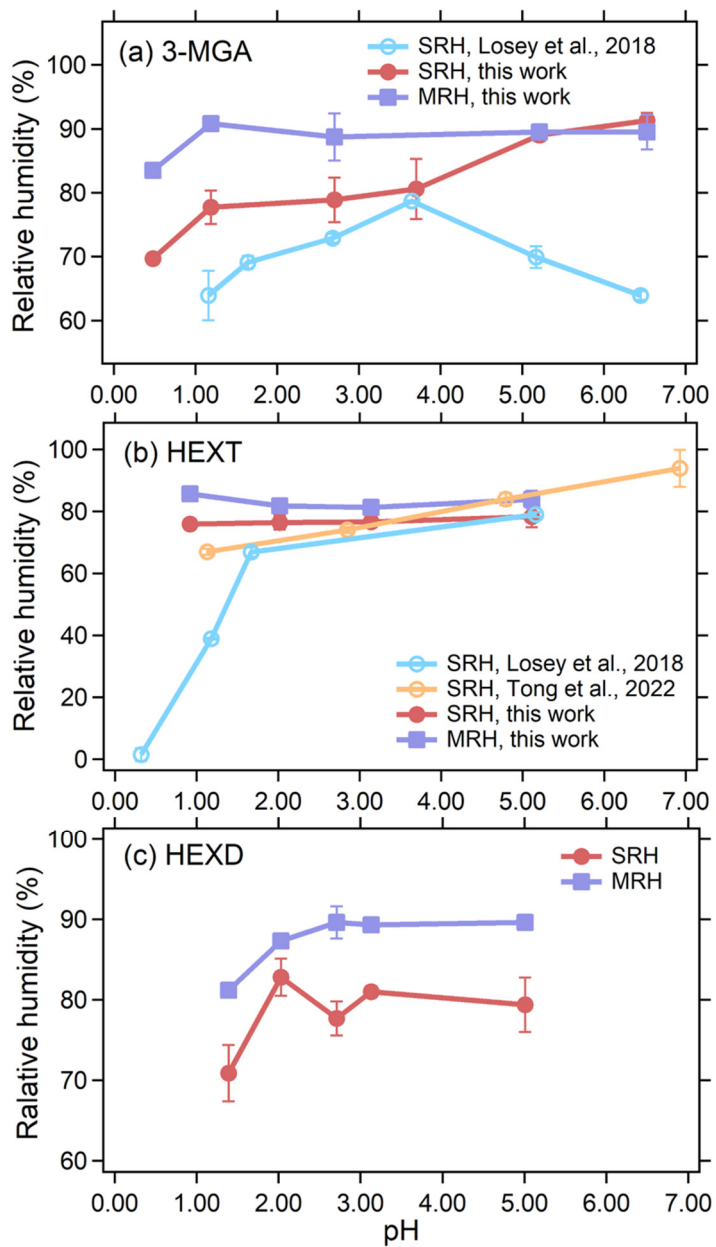

**Figure 5.** SRHs and MRHs as a function of pH for (a) 3-MGA/AS system, (b) HEXT/AS system, (c) HEXD/AS system. Hollow circles represent data from Losey et al. (2018) and Tong et al. (2022). The error bars of SRHs and MRHs are derived from multiple measurements.



**Table 2.** SRH information for each pH studied as well as initial diameter, separation diameter (SD), separation refractive index (SRI), MRH, mixing diameter (MD), and mixing refractive index (MRI) data.

| 3-MGA/AS system (O:C=0.67) |                                    |                |                      |                                 |                |                      |                                 |
|----------------------------|------------------------------------|----------------|----------------------|---------------------------------|----------------|----------------------|---------------------------------|
| Initial pH                 | Initial Diameter ( $\mu\text{m}$ ) | SRH (%)        | SD ( $\mu\text{m}$ ) | SRI ( $\lambda=650\text{ nm}$ ) | MRH (%)        | MD ( $\mu\text{m}$ ) | MRI ( $\lambda=650\text{ nm}$ ) |
| 0.48                       | 10.97 $\pm$ 1.57                   | 69.7 $\pm$ 0.2 | 7.23 $\pm$ 1.72      | 1.515 $\pm$ 0.086               | 83.5           | 6.82                 | 1.540                           |
| 1.19                       | 11.23 $\pm$ 1.20                   | 77.7 $\pm$ 2.6 | 8.68 $\pm$ 2.38      | 1.454 $\pm$ 0.100               | 90.8 $\pm$ 0.2 | 9.08 $\pm$ 1.64      | 1.394 $\pm$ 0.009               |
| 2.70                       | 12.02 $\pm$ 2.94                   | 78.9 $\pm$ 3.5 | 7.88 $\pm$ 1.21      | 1.493 $\pm$ 0.082               | 88.7 $\pm$ 3.7 | 6.81 $\pm$ 2.76      | 1.506 $\pm$ 0.094               |
| 3.70                       | 10.87 $\pm$ 1.87                   | 80.6 $\pm$ 4.7 | 7.24 $\pm$ 1.00      | 1.491 $\pm$ 0.088               |                |                      |                                 |
| 5.21                       | 11.06 $\pm$ 1.63                   | 89.0 $\pm$ 0.9 | 8.93 $\pm$ 0.16      | 1.362 $\pm$ 0.014               | 89.5           | 7.89                 | 1.381                           |
| 6.53                       | 13.73 $\pm$ 0.41                   | 91.3 $\pm$ 1.2 | 9.74 $\pm$ 0.36      | 1.444 $\pm$ 0.187               | 89.5 $\pm$ 2.7 | 7.89 $\pm$ 0.06      | 1.383 $\pm$ 0.01                |
| HEXT/AS system (O:C=0.50)  |                                    |                |                      |                                 |                |                      |                                 |
| 0.92                       | 13.52 $\pm$ 1.6                    | 75.9 $\pm$ 0.2 | 9.90 $\pm$ 0.76      | 1.421 $\pm$ 0.017               | 85.7           | 10.83                | 1.420                           |
| 2.02                       | 12.88 $\pm$ 1.0                    | 76.4 $\pm$ 2.3 | 9.09 $\pm$ 0.46      | 1.409 $\pm$ 0.007               | 81.8           | 9.34                 | 1.410                           |
| 3.14                       | 12.31 $\pm$ 0.8                    | 76.6 $\pm$ 1.5 | 9.01 $\pm$ 0.47      | 1.408 $\pm$ 0.002               | 81.3           | 9.04                 | 1.409                           |
| 5.11                       | 13.53 $\pm$ 0.4                    | 78.3 $\pm$ 3.4 | 9.15 $\pm$ 0.35      | 1.396 $\pm$ 0.014               | 83.9 $\pm$ 2.8 | 9.04 $\pm$ 0.73      | 1.412                           |
| HEXD/AS system (O:C=0.33)  |                                    |                |                      |                                 |                |                      |                                 |
| 1.39                       | 11.48 $\pm$ 0.78                   | 70.9 $\pm$ 3.5 | 7.45 $\pm$ 0.77      | 1.406 $\pm$ 0.008               | 81.2           | 7.93                 | 1.406                           |
| 2.03                       | 10.54 $\pm$ 0.57                   | 82.8 $\pm$ 2.3 | 7.90 $\pm$ 0.99      | 1.382 $\pm$ 0.007               | 87.3           | 8.83                 | 1.392                           |
| 2.71                       | 14.55 $\pm$ 1.36                   | 77.7 $\pm$ 2.1 | 8.30 $\pm$ 0.28      | 1.391 $\pm$ 0.009               | 89.6 $\pm$ 2.0 | 8.53 $\pm$ 0.32      | 1.388 $\pm$ 0.010               |
| 3.13                       | 11.02 $\pm$ 0.62                   | 81.0 $\pm$ 0.7 | 8.97 $\pm$ 0.22      | 1.384 $\pm$ 0.016               | 89.3           | 9.14                 | 1.384                           |
| 5.01                       | 12.22 $\pm$ 2.73                   | 79.4 $\pm$ 3.4 | 8.33 $\pm$ 0.40      | 1.384 $\pm$ 0.019               | 89.6 $\pm$ 0.1 | 8.38 $\pm$ 0.54      | 1.390 $\pm$ 0.004               |

21) **Fig 4:** This figure has been shown in the literature multiple times, and it is unclear what it adds to this paper. Further, these ratios at which phase separation occurs can be incorrect, depending on the system (see e.g. Ott et al. 2020). Because the main part of the paper is about aerosol pH, it is unclear why this plot is included and how it adds to the paper. Also You et al. 2013 deals with ammonium sulfate and other salts. Is only the ammonium sulfate data plotted? And for the data from this manuscript, is this only plotted for systems with no additional H<sub>2</sub>SO<sub>4</sub> or NaOH? I recommend deleting this figure and the associated text.

**Response: Thanks for your comment. We discussed Fig .4 because, iin addition to investigating systems where phase separation occurs, we also explored the phase**

behavior of glycerol/AS. We found that phase separation did not occur for organics with a large O:C ratio, as examined using AOT. We agree with point that the ratios at which phase separation occurs is depending on the system. However, we only plotted for systems with no additional H<sub>2</sub>SO<sub>4</sub> or NaOH, which means the ratios would not be affected. Yes, we only plotted the ammonium sulfate data here, because we only did the experiment with ammonium sulfate. We apologize for any confusion caused and have addressed your concern by removing Fig. 4 from the main text, relocating it to the supplement. To address your concern, we have moved Fig. 4 to the supplement while retaining the relevant discussion, as we believe it contributes to the main focus of the study. We have revised the manuscript:

“Our findings provide evidence that phase separation of droplets persists even when the organic-inorganic system is adjusted to a specific level of acidity. An important determinant of whether droplets undergo phase separation is the O:C. To illustrate this, we have included a plot in Fig. S4, which show cases the experimental system used in our study alongside relevant literature values. One point that needs to be declared is Fig. S4 only plotted for systems with no additional H<sub>2</sub>SO<sub>4</sub> or NaOH.”

22) **Line 280:** How low was SRH taken in the experiments? Did the morphology change from core shell to partially engulfed as the RH decreased, as found in Kucinski et al. 2020 or Stewart et al. 2015?

**Response:** Thanks for your comment. The SRH of all experimental systems ranged from ~70% to 90%. In certain cases, as the RH decreased, the droplet morphology changed from core-shell to partially engulfed, similar to the findings

reported by Kucinski et al. in 2020. However, as the RH further decreased, the droplet particle size became smaller than 6  $\mu\text{m}$ , making it is unable to persistently capture them using AOT. Consequently, in most instances, we were unable to observe the droplet morphology at RH levels below 70%. We have revised the manuscript:

“The SRH of all experimental systems ranged from ~70% to 90%. In certain cases, as the RH decreased, the droplet morphology changed from core-shell to partially engulfed, similar to the findings reported by Kucinski et al. (2020). However, as the RH further decreased, the droplet particle size became smaller than 6  $\mu\text{m}$ , making it impossible to capture them using AOT. Consequently, in most instances, we were unable to observe the droplet morphology at RH levels below 70%.”

## Reference

- Angle, K. J., Crocker, D. R., Simpson, R. M. C., Mayer, K. J., Garofalo, L. A., Moore, A. N., Mora Garcia, S. L., Or, V. W., Srinivasan, S., Farhan, M., Sauer, J. S., Lee, C., Pothier, M. A., Farmer, D. K., Martz, T. R., Bertram, T. H., Cappa, C. D., Prather, K. A., and Grassian, V. H.: Acidity across the interface from the ocean surface to sea spray aerosol, *Proc. Natl. Acad. Sci. U.S.A.*, 118, e2018397118, <https://doi.org/10.1073/pnas.2018397118>, 2021.
- Bertram, A. K., Martin, S. T., Hanna, S. J., Smith, M. L., Bodsworth, A., Chen, Q., Kuwata, M., Liu, A., You, Y., and Zorn, S. R.: Predicting the relative humidities of liquid-liquid phase separation, efflorescence, and deliquescence of mixed particles of ammonium sulfate, organic material, and water using the organic-to-sulfate mass ratio of the particle and the oxygen-to-carbon elemental ratio of the organic component, *Atmos. Chem. Phys.*, 11, 10995-11006, <https://doi.org/10.5194/acp-11-10995-2011>, 2011.
- Ciobanu, V. G.; Marcolli, C.; Krieger, U. K.; Weers, U.; Peter, T. Liquid-Liquid Phase Separation in Mixed Organic/Inorganic Aerosol Particles. *J. Phys. Chem. A* 2009, 113 (41), 10966–10978.
- Kucinski, T. M., Ott, E.-J. E., and Freedman, M. A.: Flash Freeze Flow Tube to Vitriify Aerosol Particles at Fixed Relative Humidity Values, *Anal.Chem.*, 92, 5207-5213, <https://doi.org/10.1021/acs.analchem.9b05757>, 2020.
- Kucinski, T. M., Ott, E. E., and Freedman, M. A.: Dynamics of liquid-liquid phase separation in submicrometer aerosol, *J. Phys. Chem. A.*, 125, 4446-4453, <https://doi.org/10.1021/acs.jpca.1c01985>, 2021.
- Liu, M., Huang, X., Song, Y., Tang, J., Cao, J., Zhang, X., Zhang, Q., Wang, S., Xu, T., Kang, L., Cai, X., Zhang, H., Yang, F., Wang, H., Yu, J. Z., Lau, A. K. H., He, L., Huang, X., Duan, L., Ding, A., Xue, L., Gao, J., Liu, B., and Zhu, T.: Ammonia emission control in China would mitigate haze pollution and nitrogen deposition, but worsen acid rain, *Proc. Natl. Acad. Sci. U. S. A.*, 116, 7760-7765, <https://doi.org/10.1073/pnas.1814880116>, 2019.

- Losey, D. J., Parker, R. G., and Freedman, M. A.: pH Dependence of Liquid–Liquid Phase Separation in Organic Aerosol, *The journal of physical chemistry letters*, 7, 3861-3865, [10.1021/acs.jpcelett.6b01621](https://doi.org/10.1021/acs.jpcelett.6b01621), 2016.
- Losey, D. J., Ott, E. J. E., and Freedman, M. A.: Effects of high acidity on phase transitions of an organic aerosol, *J. Phys. Chem. A*, 122, 3819-3828, <https://doi.org/10.1021/acs.jpca.8b00399>, 2018.
- Pei, X. Y., Meng, Y. K., Chen, Y. L., Liu, H. C., Xu, Z. N., Zhang, F., and Wang, Z. B.: Technical note: characterization of a single beam gradient force aerosol optical tweezer, in preparation, 2023.
- Reid, J. P., Dennis-Smith, B. J., Kwamena, N. O. A., Miles, R. E. H., Hanford, K. L., and Homer, C. J.: The morphology of aerosol particles consisting of hydrophobic and hydrophilic phases: hydrocarbons, alcohols and fatty acids as the hydrophobic component, *Phys. Chem. Chem. Phys.*, 13, 15559-15572, <https://doi.org/10.1039/c1cp21510h>, 2011.
- Song, S., Gao, M., Xu, W., Shao, J., Shi, G., Wang, S., Wang, Y., Sun, Y., and McElroy, M. B.: Fine-particle pH for Beijing winter haze as inferred from different thermodynamic equilibrium models, *Atmos. Chem. Phys.*, 18, 7423-7438, <https://doi.org/10.5194/acp-18-7423-2018>, 2018.
- Tong, Y. K., Meng, X. X. Y., Zhou, B., Sun, R., Wu, Z. J., Hu, M., and Ye, A. P.: Detecting the pH-dependent liquid-liquid phase separation of single levitated aerosol microdroplets via laser tweezers-Raman spectroscopy, *Front. Phys.*, 10, <https://doi.org/10.3389/fphy.2022.969921>, 2022
- You, Y., Smith, M. L., Song, M., Martin, S. T., Bertram, A. K.: Liquid-liquid phase separation in atmospherically relevant particles consisting of organic species and inorganic salts, *Int. Rev. Phys. Chem.*, 33 (1), 43–77, <http://doi.org/10.1080/0144235X.2014.890786>, 2014.
- Zhou, Q., Pang, S.-F., Wang, Y., Ma, J.-B., and Zhang, Y.-H.: Confocal Raman studies of the evolution of the physical state of mixed phthalic acid/ammonium sulfate aerosol droplets and the effect of substrates, *J. Phys. Chem. B*, 118, 6198-6205, <https://doi.org/10.1021/jp5004598>, 2014.
